# Supplementary material for: Anisotropic photogenerated charge separations between different facets of a dodecahedral α-Fe2O3 photocatalyst
Source: Royal Society of Chemistry journal article supplement (doi:10.1039/c9ce01143a), 2019-01-01
Supplement: c9ce01143a1.pdf [file c9ce01143a1.pdf]

## Anisotropic photogenerated charge separations between different facets of dodecahedral $\alpha$ - $\text{Fe}_2\text{O}_3$ photocatalyst

Conghui Wang<sup>\*a,b</sup>, Chuanming Zhu<sup>b</sup>, Xiaobo Ren<sup>a</sup>, Jing Shi<sup>c</sup>, Liancheng Wang<sup>a</sup>, Baoliang Lv<sup>\*a</sup>

*a. State Key Laboratory of Coal Conversion, Institute of Coal Chemistry, Chinese Academy of Sciences, Taiyuan 030001, China. E-mail : lbl604@sxicc.ac.cn*

*b. College of Chemical Engineering, Xiangtan University, Xiangtan 411105, China*

*c. Analytical Instrumentation center, Institute of coal chemistry, Chinese Academy of Sciences, 27 South Taoyuan Road, Taiyuan 030001, China*

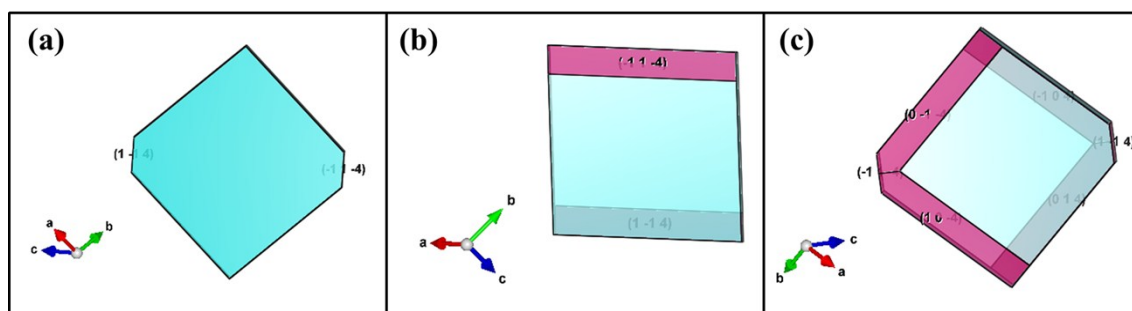

**Fig. S1** When two edges are selectively truncated, the TEM images should be composed of two kinds of morphology: (a) pseudo cubic  $\alpha$ - $\text{Fe}_2\text{O}_3$  (PCFe) with two edges being selectively truncated; (b) PCFe with integrate angles. (c) When six edges that intersect with c axis are cut off, the shadow of (c) accords with TEM images in the paper.

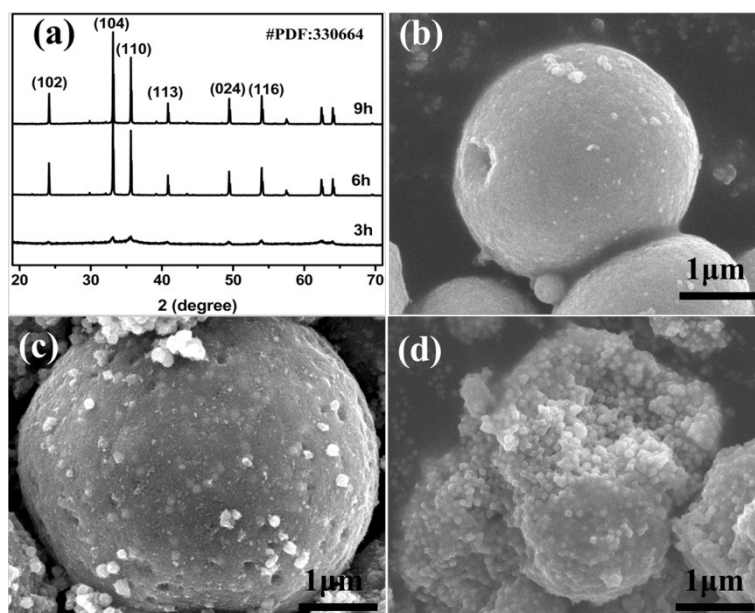

**Fig. S2** Powder XRD patterns (a) and SEM images (b-d) of the products at reaction time: (b) 3 h; (c) 6 h; (d) 9 h.  $\text{Fe}(\text{NO}_3)_3$  is 2.4g, ammonium acetate is 2 M, ethanol and water are 60ml and 3ml, respectively.

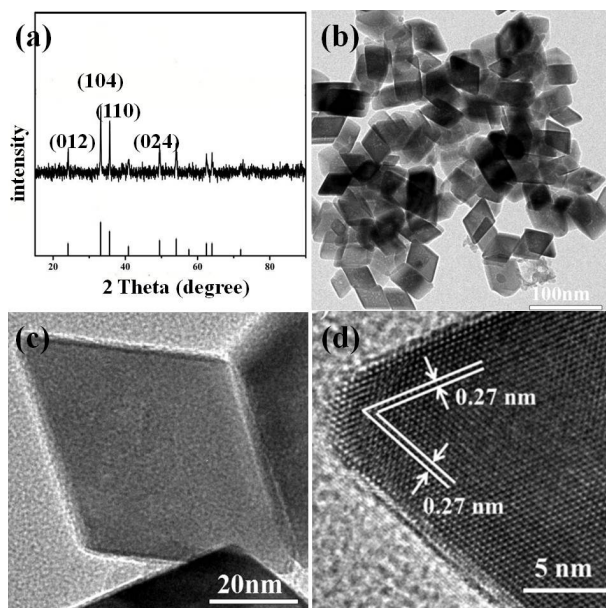

**Fig. S3** (a) XRD and (b) Low-magnification TEM image of the synthesized RhFe particles; (c) Typical high-magnification TEM image of individual nanocrystals and the inset is the corresponding SAED; (d) image taken from the tips of the nanocrystals.

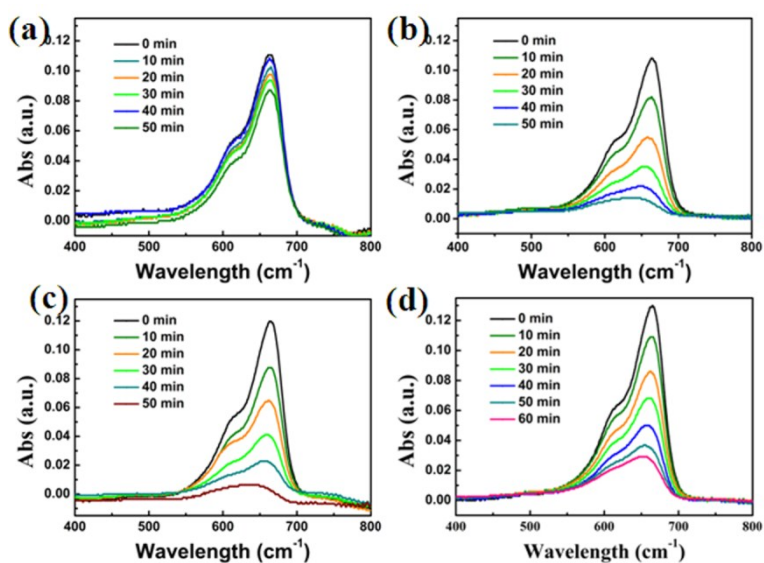

**Fig. S4** Photodegradation of MB by using (a) DoFe-1 without  $H_2O_2$ ; (b) RhFe; (c) DoFe-1 and (d) DoFe-3. When ammonium acetate was 2 M/4 M, the obtained samples are named as DoFe-1 / DoFe-3.

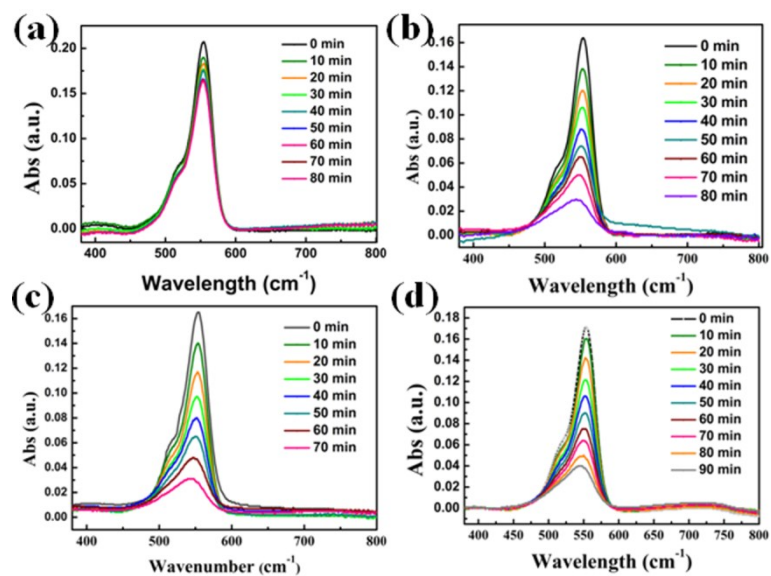

**Fig. S5** Photodegradation of RhB by using (a) DoFe-1 without  $\text{H}_2\text{O}_2$ ; (b) RhFe; (c) DoFe-1 and (d) DoFe-3. When ammonium acetate was 2 M/4 M, the obtained samples are named as DoFe-1 / DoFe-3.

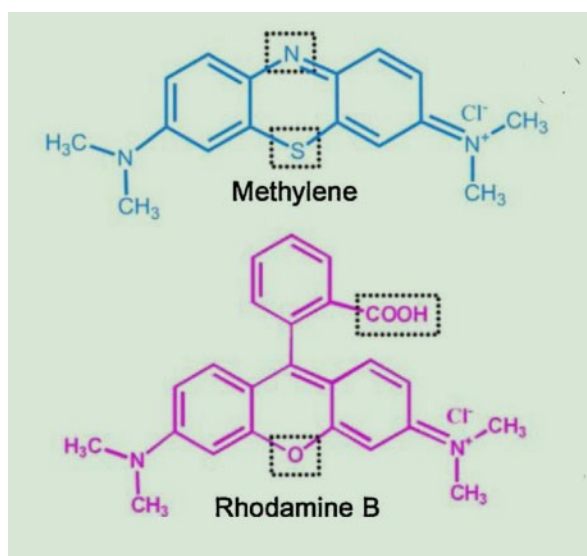

**Fig. S6** The molecular structure of MB and RhB dyes.

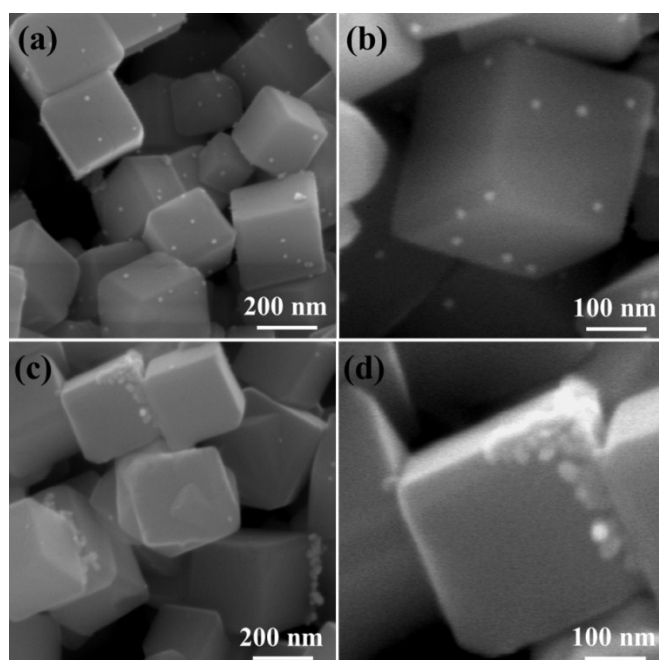

**Fig. S7** The SEM images of DoFe nanocrystals with the deposition of Au (a, b) in dark and (c, d) induced by full spectrum light source.

**Table S1** Samples obtained under different experimental conditions (AA: ammonium acetate).

| Sample No. | Ethanol/ml | Water/ml | AA/ M | Size/ nm |
|------------|------------|----------|-------|----------|
| DoFe-1     | 60         | 4.2      | 1     | 75± 5    |
| DoFe-2     | 60         | 3        | 1     | 100± 5   |
| DoFe-3     | 60         | 3        | 2     | 160± 10  |

**Table S2.** A simple summary of photodegradation on pure  $\alpha$ -Fe<sub>2</sub>O<sub>3</sub> of different morphology. Usually, the analysis focuses on surface structure while it is clear that morphology with best performance always expose at least two kinds of crystal facets.

| Morphology<br>with best performance | Crystal facets         | Dye | Reference |
|-------------------------------------|------------------------|-----|-----------|
| Truncated nanocube                  | (012) and (104)        | RhB | [18]      |
| Icositetrahedron                    | (110), (104) and (113) | RhB | [27]      |
| Hexagonal nanoplate                 | (110), (012) and (104) | MB  | [29]      |
| Octodecahedron                      | (113) and (104)        | MB  | [30]      |
| Truncated dodecahedron              | (012) and (001)        | RhB | [32]      |
| Polyhedron                          | (101) and (001)        | MB  | [40]      |
